# Supplementary material for: DNA polymerase ι functions in the generation of tandem mutations during somatic hypermutation of antibody genes
Source: PubMed Central journal article supplement — J Exp Med. 2016 Aug 22;213(9):1675–83. doi: 10.1084/jem.20151227 (PMC4995076; doi:10.1084/jem.20151227), 2016-08-22
Supplement: supp_jem.20151227_JEM_20151227_sm.pdf [file supp_jem.20151227_JEM_20151227_sm.pdf]

Table S1. Mutation frequency at each nucleotide in the J<sub>H</sub>4 intron from C57BL/6 mice

| Position | Nucleotide | # Mut. | Mut. Freq. | Position | Nucleotide | # Mut. | Mut. Freq. | Position | Nucleotide | # Mut. | Mut. Freq. | Position | Nucleotide | # Mut. | Mut. Freq. | Position | Nucleotide | # Mut. | Mut. Freq. |
|----------|------------|--------|------------|----------|------------|--------|------------|----------|------------|--------|------------|----------|------------|--------|------------|----------|------------|--------|------------|
| 1        | G          | 3      | 0.00105    | 101      | T          | 2      | 0.00070    | 201      | T          | 1      | 0.00035    | 301      | A          | 5      | 0.00174    | 401      | G          | 5      | 0.00174    |
| 2        | G          | 0      | 0.00000    | 102      | G          | 3      | 0.00105    | 202      | G          | 1      | 0.00035    | 302      | T          | 3      | 0.00105    | 402      | G          | 4      | 0.00140    |
| 3        | T          | 0      | 0.00000    | 103      | A          | 4      | 0.00140    | 203      | G          | 0      | 0.00000    | 303      | T          | 4      | 0.00140    | 403      | A          | 2      | 0.00070    |
| 4        | A          | 24     | 0.00837    | 104      | G          | 5      | 0.00174    | 204      | A          | 5      | 0.00174    | 304      | T          | 4      | 0.00140    | 404      | G          | 7      | 0.00244    |
| 5        | A          | 3      | 0.00105    | 105      | A          | 5      | 0.00174    | 205      | G          | 3      | 0.00105    | 305      | T          | 7      | 0.00244    | 405      | T          | 4      | 0.00140    |
| 6        | G          | 15     | 0.00523    | 106      | G          | 5      | 0.00174    | 206      | T          | 2      | 0.00070    | 306      | C          | 2      | 0.00070    | 406      | G          | 1      | 0.00035    |
| 7        | A          | 13     | 0.00454    | 107      | A          | 2      | 0.00070    | 207      | C          | 1      | 0.00035    | 307      | A          | 2      | 0.00070    | 407      | G          | 0      | 0.00000    |
| 8        | A          | 34     | 0.01186    | 108      | A          | 14     | 0.00488    | 208      | C          | 0      | 0.00000    | 308      | G          | 3      | 0.00105    | 408      | G          | 0      | 0.00000    |
| 9        | T          | 2      | 0.00070    | 109      | G          | 18     | 0.00628    | 209      | C          | 3      | 0.00105    | 309      | T          | 4      | 0.00140    | 409      | G          | 18     | 0.00628    |
| 10       | G          | 1      | 0.00035    | 110      | T          | 5      | 0.00174    | 210      | T          | 1      | 0.00035    | 310      | T          | 5      | 0.00174    | 410      | C          | 0      | 0.00000    |
| 11       | G          | 3      | 0.00105    | 111      | T          | 1      | 0.00035    | 211      | G          | 1      | 0.00035    | 311      | T          | 5      | 0.00174    | 411      | A          | 5      | 0.00174    |
| 12       | C          | 4      | 0.00140    | 112      | G          | 1      | 0.00035    | 212      | G          | 2      | 0.00070    | 312      | T          | 2      | 0.00070    | 412      | C          | 5      | 0.00174    |
| 13       | C          | 1      | 0.00035    | 113      | G          | 2      | 0.00070    | 213      | A          | 4      | 0.00140    | 313      | T          | 5      | 0.00174    | 413      | T          | 6      | 0.00209    |
| 14       | T          | 1      | 0.00035    | 114      | G          | 12     | 0.00419    | 214      | T          | 3      | 0.00105    | 314      | A          | 10     | 0.00349    | 414      | T          | 6      | 0.00209    |
| 15       | C          | 2      | 0.00070    | 115      | A          | 6      | 0.00209    | 215      | G          | 2      | 0.00070    | 315      | G          | 7      | 0.00244    | 415      | T          | 1      | 0.00035    |
| 16       | T          | 2      | 0.00070    | 116      | A          | 7      | 0.00244    | 216      | A          | 2      | 0.00070    | 316      | A          | 3      | 0.00105    | 416      | C          | 3      | 0.00105    |
| 17       | C          | 6      | 0.00209    | 117      | A          | 8      | 0.00279    | 217      | T          | 12     | 0.00419    | 317      | A          | 15     | 0.00523    | 417      | T          | 6      | 0.00209    |
| 18       | C          | 6      | 0.00209    | 118      | T          | 11     | 0.00384    | 218      | G          | 0      | 0.00000    | 318      | T          | 8      | 0.00279    | 418      | T          | 2      | 0.00070    |
| 19       | A          | 4      | 0.00140    | 119      | A          | 12     | 0.00419    | 219      | G          | 3      | 0.00105    | 319      | A          | 8      | 0.00279    | 419      | T          | 4      | 0.00140    |
| 20       | G          | 10     | 0.00349    | 120      | A          | 12     | 0.00419    | 220      | G          | 10     | 0.00349    | 320      | A          | 5      | 0.00174    | 420      | A          | 2      | 0.00070    |
| 21       | G          | 1      | 0.00035    | 121      | A          | 13     | 0.00454    | 221      | A          | 2      | 0.00070    | 321      | A          | 4      | 0.00140    | 421      | G          | 6      | 0.00209    |
| 22       | T          | 0      | 0.00000    | 122      | C          | 17     | 0.00593    | 222      | T          | 5      | 0.00174    | 322      | A          | 5      | 0.00174    | 422      | A          | 1      | 0.00035    |
| 23       | C          | 3      | 0.00105    | 123      | T          | 1      | 0.00035    | 223      | A          | 12     | 0.00419    | 323      | G          | 12     | 0.00419    | 423      | T          | 2      | 0.00070    |
| 24       | T          | 12     | 0.00419    | 124      | G          | 2      | 0.00070    | 224      | G          | 0      | 0.00000    | 324      | T          | 4      | 0.00140    | 424      | T          | 3      | 0.00105    |
| 25       | T          | 3      | 0.00105    | 125      | T          | 0      | 0.00000    | 225      | G          | 0      | 0.00000    | 325      | A          | 32     | 0.01117    | 425      | T          | 1      | 0.00035    |
| 26       | T          | 11     | 0.00384    | 126      | C          | 6      | 0.00209    | 226      | G          | 0      | 0.00000    | 326      | T          | 8      | 0.00279    | 426      | G          | 2      | 0.00070    |
| 27       | A          | 10     | 0.00349    | 127      | T          | 5      | 0.00174    | 227      | A          | 5      | 0.00174    | 327      | T          | 12     | 0.00419    | 427      | T          | 1      | 0.00035    |
| 28       | T          | 11     | 0.00384    | 128      | A          | 13     | 0.00454    | 228      | C          | 0      | 0.00000    | 328      | A          | 10     | 0.00349    | 428      | G          | 0      | 0.00000    |
| 29       | T          | 4      | 0.00140    | 129      | G          | 0      | 0.00000    | 229      | T          | 2      | 0.00070    | 329      | G          | 4      | 0.00140    | 429      | A          | 4      | 0.00140    |
| 30       | T          | 3      | 0.00105    | 130      | G          | 0      | 0.00000    | 230      | T          | 3      | 0.00105    | 330      | T          | 13     | 0.00454    | 430      | C          | 1      | 0.00035    |
| 31       | T          | 5      | 0.00174    | 131      | G          | 6      | 0.00209    | 231      | T          | 4      | 0.00140    | 331      | T          | 4      | 0.00140    | 431      | G          | 1      | 0.00035    |
| 32       | T          | 2      | 0.00070    | 132      | A          | 4      | 0.00140    | 232      | G          | 0      | 0.00000    | 332      | G          | 2      | 0.00070    | 432      | A          | 3      | 0.00105    |
| 33       | A          | 17     | 0.00593    | 133      | T          | 3      | 0.00105    | 233      | G          | 0      | 0.00000    | 333      | T          | 8      | 0.00279    | 433      | A          | 6      | 0.00209    |
| 34       | A          | 10     | 0.00349    | 134      | C          | 5      | 0.00174    | 234      | A          | 4      | 0.00140    | 334      | G          | 4      | 0.00140    | 434      | T          | 1      | 0.00035    |
| 35       | C          | 19     | 0.00663    | 135      | T          | 1      | 0.00035    | 235      | G          | 0      | 0.00000    | 335      | G          | 4      | 0.00140    | 435      | G          | 1      | 0.00035    |
| 36       | C          | 7      | 0.00244    | 136      | C          | 2      | 0.00070    | 236      | G          | 4      | 0.00140    | 336      | A          | 6      | 0.00209    | 436      | T          | 6      | 0.00209    |
| 37       | T          | 1      | 0.00035    | 137      | A          | 7      | 0.00244    | 237      | C          | 2      | 0.00070    | 337      | A          | 8      | 0.00279    | 437      | T          | 0      | 0.00000    |
| 38       | T          | 7      | 0.00244    | 138      | G          | 1      | 0.00035    | 238      | T          | 5      | 0.00174    | 338      | T          | 21     | 0.00733    | 438      | C          | 0      | 0.00000    |
| 39       | T          | 3      | 0.00105    | 139      | A          | 4      | 0.00140    | 239      | C          | 3      | 0.00105    | 339      | A          | 12     | 0.00419    | 439      | C          | 1      | 0.00035    |
| 40       | G          | 55     | 0.01919    | 140      | G          | 4      | 0.00140    | 240      | A          | 3      | 0.00105    | 340      | T          | 4      | 0.00140    | 440      | G          | 10     | 0.00349    |
| 41       | T          | 4      | 0.00140    | 141      | C          | 10     | 0.00349    | 241      | T          | 12     | 0.00419    | 341      | A          | 17     | 0.00593    | 441      | C          | 1      | 0.00035    |
| 42       | T          | 8      | 0.00279    | 142      | C          | 2      | 0.00070    | 242      | T          | 6      | 0.00209    | 342      | C          | 18     | 0.00628    | 442      | A          | 2      | 0.00070    |
| 43       | A          | 17     | 0.00593    | 143      | T          | 2      | 0.00070    | 243      | T          | 0      | 0.00000    | 343      | T          | 4      | 0.00140    | 443      | C          | 0      | 0.00000    |
| 44       | T          | 5      | 0.00174    | 144      | T          | 7      | 0.00244    | 244      | G          | 0      | 0.00000    | 344      | T          | 1      | 0.00035    | 444      | T          | 5      | 0.00174    |
| 45       | G          | 2      | 0.00070    | 145      | T          | 6      | 0.00209    | 245      | A          | 4      | 0.00140    | 345      | C          | 1      | 0.00035    | 445      | A          | 13     | 0.00454    |
| 46       | G          | 2      | 0.00070    | 146      | A          | 8      | 0.00279    | 246      | A          | 15     | 0.00523    | 346      | A          | 6      | 0.00209    | 446      | G          | 2      | 0.00070    |
| 47       | A          | 12     | 0.00419    | 147      | G          | 5      | 0.00174    | 247      | G          | 4      | 0.00140    | 347      | G          | 0      | 0.00000    | 447      | A          | 3      | 0.00105    |
| 48       | G          | 57     | 0.01989    | 148      | G          | 0      | 0.00000    | 248      | A          | 5      | 0.00174    | 348      | G          | 1      | 0.00035    | 448      | T          | 6      | 0.00209    |
| 49       | T          | 4      | 0.00140    | 149      | A          | 5      | 0.00174    | 249      | A          | 5      | 0.00174    | 349      | A          | 4      | 0.00140    | 449      | T          | 1      | 0.00035    |
| 50       | T          | 6      | 0.00209    | 150      | C          | 2      | 0.00070    | 250      | G          | 9      | 0.00314    | 350      | C          | 1      | 0.00035    | 450      | G          | 6      | 0.00209    |
| 51       | T          | 5      | 0.00174    | 151      | A          | 2      | 0.00070    | 251      | A          | 2      | 0.00070    | 351      | C          | 5      | 0.00174    | 451      | T          | 0      | 0.00000    |
| 52       | T          | 3      | 0.00105    | 152      | G          | 4      | 0.00140    | 252      | T          | 5      | 0.00174    | 352      | A          | 4      | 0.00140    | 452      | T          | 4      | 0.00140    |
| 53       | C          | 9      | 0.00314    | 153      | A          | 2      | 0.00070    | 253      | G          | 8      | 0.00279    | 353      | C          | 3      | 0.00105    | 453      | T          | 6      | 0.00209    |
| 54       | T          | 1      | 0.00035    | 154      | T          | 9      | 0.00314    | 254      | C          | 20     | 0.00698    | 354      | C          | 3      | 0.00105    | 454      | A          | 5      | 0.00174    |
| 55       | G          | 2      | 0.00070    | 155      | T          | 12     | 0.00419    | 255      | T          | 10     | 0.00349    | 355      | T          | 1      | 0.00035    | 455      | A          | 3      | 0.00105    |
| 56       | A          | 6      | 0.00209    | 156      | A          | 9      | 0.00314    | 256      | A          | 16     | 0.00558    | 356      | C          | 2      | 0.00070    | 456      | A          | 3      | 0.00105    |
| 57       | G          | 68     | 0.02373    | 157      | T          | 1      | 0.00035    | 257      | A          | 2      | 0.00070    | 357      | T          | 6      | 0.00209    | 457      | A          | 6      | 0.00209    |
| 58       | C          | 16     | 0.00558    | 158      | C          | 6      | 0.00209    | 258      | A          | 7      | 0.00244    | 358      | G          | 2      | 0.00070    | 458      | C          | 12     | 0.00419    |
| 59       | A          | 10     | 0.00349    | 159      | T          | 1      | 0.00035    | 259      | A          | 9      | 0.00314    | 359      | T          | 2      | 0.00070    | 459      | T          | 5      | 0.00174    |
| 60       | T          | 7      | 0.00244    | 160      | C          | 8      | 0.00279    | 260      | C          | 15     | 0.00523    | 360      | G          | 0      | 0.00000    | 460      | T          | 0      | 0.00000    |
| 61       | T          | 4      | 0.00140    | 161      | C          | 4      | 0.00140    | 261      | A          | 4      | 0.00140    | 361      | A          | 0      | 0.00000    | 461      | C          | 1      | 0.00035    |
| 62       | G          | 26     | 0.00907    | 162      | A          | 5      | 0.00174    | 262      | A          | 19     | 0.00663    | 362      | C          | 4      | 0.00140    | 462      | A          | 5      | 0.00174    |
| 63       | C          | 44     | 0.01535    | 163      | C          | 1      | 0.00035    | 263      | A          | 4      | 0.00140    | 363      | A          | 3      | 0.00105    | 463      | T          | 2      | 0.00070    |
| 64       | A          | 9      | 0.00314    | 164      | A          | 4      | 0.00140    | 264      | C          | 2      | 0.00070    | 364      | G          | 13     | 0.00454    | 464      | T          | 9      | 0.00314    |
| 65       | G          | 6      | 0.00209    | 165      | T          | 1      | 0.00035    | 265      | C          | 7      | 0.00244    | 365      | C          | 9      | 0.00314    | 465      | T          | 0      | 0.00000    |
| 66       | A          | 3      | 0.00105    | 166      | C          | 12     | 0.00419    | 266      | T          | 5      | 0.00174    | 366      | A          | 6      | 0.00209    | 466      | G          | 2      | 0.00070    |
| 67       | C          | 10     | 0.00349    | 167      | T          | 3      | 0.00105    | 267      | A          | 27     | 0.00942    | 367      | T          | 3      | 0.00105    | 467      | T          | 5      | 0.00174    |
| 68       | T          | 8      | 0.00279    | 168      | T          | 4      | 0.00140    | 268      | T          | 3      | 0.00105    | 368      | T          | 7      | 0.00244    | 468      | T          | 2      | 0.00070    |
| 69       | A          | 17     | 0.00593    | 169      | T          | 2      | 0.00070    | 269      | G          | 0      | 0.00000    | 369      | T          | 2      | 0.00070    | 469      | G          | 0      | 0.00000    |
| 70       | A          | 25     | 0.00872    | 170      | G          | 2      | 0.00070    | 270      | G          | 13     | 0.00454    | 370      | A          | 5      | 0.00174    | 470      | G          | 0      | 0.00000    |
| 71       | T          | 4      | 0.00140    | 171      | A          | 4      | 0.00140    | 271      | C          | 2      | 0.00070    | 371      | T          | 14     | 0.00488    | 471      | A          | 2      | 0.00070    |
| 72       | C          | 16     | 0.00558    | 172      | A          | 11     | 0.00384    | 272      | T          | 2      | 0.00070    | 372      | A          | 11     | 0.00384    | 472      | A          | 3      | 0.00105    |
| 73       | T          | 3      | 0.00105    | 173      | A          | 6      | 0.00209    | 273      | G          | 0      | 0.00000    | 373      | C          | 12     | 0.00419    | 473      | G          | 3      | 0.00105    |
| 74       | T          | 2      | 0.00070    | 174      | A          | 4      | 0.00140    | 274      | G          | 0      | 0.00000    | 374      | A          | 1      | 0.00035    | 474      | G          | 0      | 0.00000    |
| 75       | G          | 17     | 0.00593    | 175      | A          | 12     | 0.00419    | 275      | A          | 6      | 0.00209    | 375      | G          | 7      | 0.00244    | 475      | A          | 2      | 0.00070    |
| 76       | G          | 6      | 0.00209    | 176      | C          | 17     | 0.00593    | 276      | G          | 0      | 0.00000    | 376      | T          | 9      |            |          |            |        |            |
